# Supplementary material
Source: PubMed Central journal article supplement (PMC5975225)
Supplement: NIHMS967276-supplement-supplemental_table_1.pdf [file NIHMS967276-supplement-supplemental_table_1.pdf]

**Supplementary Table 1: Individual Urine Drug Testing for Opioids and Opioid Antagonists**

| <i>Participant #</i> | <i>Diacetylmorphine</i> | <i>6-MAM</i> | <i>Morphine</i> | <i>Codeine</i> | <i>Fentanyl</i> | <i>Norfentanyl</i> | <i>Acetylfentanyl</i> | <i>U-47700</i> | <i>Hydromorphone</i> | <i>Oxymorphone</i> | <i>Hydrocodone</i> | <i>Oxycodone</i> | <i>Tramadol</i> | <i>O-Desmethyltramadol</i> | <i>Buprenorphine</i> | <i>Norbuprenorphine</i> | <i>Methadone</i> | <i>Naloxone</i> |
|----------------------|-------------------------|--------------|-----------------|----------------|-----------------|--------------------|-----------------------|----------------|----------------------|--------------------|--------------------|------------------|-----------------|----------------------------|----------------------|-------------------------|------------------|-----------------|
| 1                    |                         |              | +               | +              | +               | +                  |                       |                |                      |                    |                    |                  |                 |                            |                      |                         | +                | +               |
| 2                    |                         | +            | +               | +              | +               | +                  | +                     |                | +                    | +                  |                    |                  |                 |                            | +                    | +                       |                  | +               |
| 3                    |                         | +            | +               | +              | +               | +                  | +                     |                |                      | +                  |                    |                  |                 |                            |                      |                         | +                | +               |
| 4                    |                         |              | +               | +              | +               | +                  |                       |                |                      |                    |                    |                  | +               | +                          |                      |                         |                  | +               |
| 5                    |                         | +            | +               | +              | +               | +                  |                       |                |                      |                    |                    |                  |                 |                            |                      |                         |                  | +               |
| 6                    |                         | +            | +               | +              | +               | +                  |                       |                |                      |                    |                    |                  |                 |                            |                      |                         |                  | +               |
| 7                    | +                       | +            | +               | +              | +               | +                  |                       |                |                      |                    |                    |                  | +               |                            |                      |                         |                  | +               |
| 8                    |                         |              |                 |                | +               | +                  |                       |                |                      |                    |                    |                  |                 |                            |                      |                         |                  | +               |
| 9                    |                         |              | +               | +              | +               | +                  |                       |                |                      |                    |                    |                  |                 |                            |                      |                         |                  | +               |
| 10                   |                         |              |                 |                | +               | +                  |                       |                |                      | +                  |                    |                  |                 |                            |                      |                         |                  | +               |
| 11                   |                         |              | +               | +              | +               | +                  |                       |                |                      |                    |                    |                  |                 |                            |                      |                         |                  | +               |
| 12                   |                         |              | +               |                | +               | +                  |                       |                |                      |                    |                    |                  |                 |                            |                      |                         |                  | +               |
| 13                   |                         | +            |                 | +              | +               | +                  |                       |                |                      |                    |                    |                  |                 |                            | +                    | +                       |                  | +               |
| 14                   |                         | +            | +               | +              | +               | +                  |                       |                |                      |                    |                    |                  |                 |                            |                      | +                       |                  | +               |
| 15                   |                         | +            | +               | +              | +               |                    |                       |                |                      |                    |                    |                  | +               | +                          |                      |                         | +                | +               |
| 16                   |                         | +            | +               | +              | +               | +                  |                       |                |                      |                    |                    |                  | +               | +                          |                      |                         | +                | +               |
| 17                   |                         | +            | +               | +              | +               | +                  |                       |                |                      |                    |                    |                  | +               | +                          | +                    | +                       |                  | +               |
| 18                   |                         | +            | +               | +              | +               | +                  |                       |                |                      |                    |                    |                  |                 |                            |                      |                         |                  | +               |
| 19                   |                         |              | +               |                | +               | +                  | +                     |                |                      |                    |                    |                  |                 |                            |                      | +                       | +                | +               |
| 20                   |                         | +            | +               | +              | +               | +                  | +                     | +              |                      |                    |                    | +                |                 |                            |                      |                         |                  | +               |
| 21                   | +                       | +            | +               | +              | +               | +                  | +                     | +              |                      |                    | +                  |                  |                 |                            |                      |                         |                  | +               |
| 22                   | +                       | +            | +               | +              | +               | +                  |                       |                | +                    |                    |                    |                  | +               |                            |                      |                         |                  | +               |
| 23                   |                         |              | +               |                | +               | +                  |                       |                |                      |                    |                    |                  |                 |                            |                      |                         |                  | +               |
| 24                   |                         | +            | +               | +              |                 |                    |                       |                |                      |                    |                    |                  |                 |                            |                      |                         |                  | +               |
| 25                   |                         | +            | +               |                | +               | +                  | +                     |                |                      |                    |                    |                  |                 |                            |                      |                         |                  | +               |
| 26                   |                         |              | +               | +              | +               | +                  | +                     |                |                      |                    |                    |                  |                 |                            |                      |                         |                  | +               |
| 27                   |                         | +            | +               | +              | +               | +                  | +                     |                |                      |                    |                    | +                |                 |                            |                      |                         |                  | +               |
| 28                   |                         | +            | +               | +              | +               | +                  | +                     |                |                      |                    |                    |                  | +               | +                          |                      |                         |                  | +               |
| 29                   |                         | +            | +               | +              | +               | +                  |                       |                |                      |                    |                    |                  |                 |                            |                      |                         |                  | +               |
| 30                   |                         | +            | +               | +              | +               | +                  |                       |                |                      |                    |                    |                  |                 |                            | +                    | +                       |                  | +               |
| <b>Total</b>         | <b>3</b>                | <b>20</b>    | <b>27</b>       | <b>24</b>      | <b>29</b>       | <b>28</b>          | <b>9</b>              | <b>2</b>       | <b>4</b>             | <b>2</b>           | <b>2</b>           | <b>2</b>         | <b>7</b>        | <b>5</b>                   | <b>4</b>             | <b>6</b>                | <b>5</b>         | <b>30</b>       |
